# Supplementary material for: Students in a Course-Based Undergraduate Research Experience Course Discovered Dramatic Changes in the Bacterial Community Composition Between Summer and Winter Lake Samples
Source: Frontiers journal article supplement (doi:10.3389/fmicb.2021.579325), 2021-02-18
Supplement: Table_1.pdf [file Table_1.pdf]

**Table S1: Detailed description of the students' data-processing and bottlenecks.**

- 1) The students were asked to download the metadata Excel template from the MG-RAST upload page and view an online video tutorial (Argonne National Laboratory, 2012)
- 2) The two compressed (.qz) files containing the multiplexed read files (\*.fastq), the multiplexing index file and the metadata file were uploaded to MG-RASTS as described in the video tutorial (Argonne National Laboratory, 2017).
- 3) To join pair-end reads the forward (R1) and reverse (R2) file icons were dragged into the “Drag file(s) here” box.
- 4) Sequences were demultiplexed by clicking the demultiplex icon and dragging the index file and the merged FASTQ sequence file into the “Drag file(s) here” box.
- 5) To submit the sequences for quality control processing and find homologies to the SILVA 16S rRNA databases (Quast et al., 2012), the metadata file was selected, the project was given a name, fastq sequencing files were selected, Phred score cut-off was increased from 15 (default value) to 20, and prior processing level was selected before submitting.
- 6) After processing, quality control reports, the number of observed homologies (a.k.a., hits), rarefaction curves, and taxonomic analysis for each library was accessed by following the path download > search website > dataset name.
- 7) The Analysis Tool option was used to combine data and to choose data sets to assign operational taxonomic units (OTU).
- 8) To transfer the OTU count data and corresponding taxonomy from MG-RAST, the Analysis page was set to species-level taxonomy, and the tab separated values (TSV) file was downloaded.
- 9) The TSV file was imported into a spreadsheet, sorted, and unwanted taxa (i.e., eukaryotes, viruses, OTU present in the DNA-free controls) deleted.
- 10) The process data were arranged in Microbiome Analysis formats (Dhariwal et al., 2017) and exported as a tab-delimited TXT file. Files produced were OTU count data, SILVA taxonomy, and metadata. The data sets used are posted in Supplementary Table S2.

| <b>Bottlenecks</b>                                    | <b>Comment and Resolution</b>                                                                                                                                                                                                                                                                                                                                                                                                                                                                                                                                                                                                                      |
|-------------------------------------------------------|----------------------------------------------------------------------------------------------------------------------------------------------------------------------------------------------------------------------------------------------------------------------------------------------------------------------------------------------------------------------------------------------------------------------------------------------------------------------------------------------------------------------------------------------------------------------------------------------------------------------------------------------------|
| Time for next-generation sequencing                   | <p>Most commercial next-generation sequencing services can require 4 to 6 weeks to sequence samples. As a result, when designing the course, the instructor should consider:</p> <ul style="list-style-type: none"> <li>• Performing environmental DNA extraction early in the course.</li> <li>• Using the wait-time for the class to perform related experiments. In this course, the students conducted chemical analyses of water samples.</li> <li>• Using real-time technologies such as Oxford Nanopore (Oxford, United Kingdom) MinION sequencing (Brown et al., 2017; Mitsuhashi et al., 2017).</li> </ul>                                |
| Uploading metadata into MG-RAST (Meyer et al., 2008). | <p>The metadata formatting requirements for MG-RAST is precise and somewhat cryptic. As a result, student submissions of the metadata file often failed validation. The following strategies may help overcome the bottleneck:</p> <ul style="list-style-type: none"> <li>• Download the metadata Excel template provided by MG-RAST</li> <li>• Have students watch the metadata entry video tutorial produced by Argonne National Laboratory (2012).</li> <li>• Have multiple students work on metadata entry. Once a student is successful in having their metadata file validated, share that file with the other students.</li> </ul>          |
| Time for MG-RAST homology search                      | <p>Because of the high volume of work on the MG-RAST supercomputer complex (Meyer et al., 2017), it can take a few days from the time sequence data is uploaded into MG-RAST until the operational taxonomic unit (OTU) counts are produced. To reduce the time for data processing:</p> <ul style="list-style-type: none"> <li>• Only submit sequence data files once. The students can aggregate sequence datasets using identification numbers generated by MG-RAST.</li> <li>• Choose the option of making the sequence data immediately available. The data queue processing algorithm places the highest priority on public data.</li> </ul> |
| Data Analysis on MG-RAST                              | <p>Because of the huge dataset in MG-RAST and its high demand on classroom wireless internet, the students may experience difficulties using the analysis tools. To remedy the bottleneck:</p> <ul style="list-style-type: none"> <li>• Export the OTU count data at the species level as a tab-delimited file.</li> <li>• Use a spreadsheet to delete undesired data (e.g., eukaryotes).</li> <li>• Use spreadsheet software to format the data file into a format compatible with MicrobiomeAnalyst (Dhariwal et al., 2017; Chong et al., 2020).</li> <li>• Use MicrobiomeAnalyst to perform data normalization and analysis.</li> </ul>         |

## References

- Argonne National Laboratory (2012). The MG-RAST Metadata Spreadsheet <http://youtu.be/8YT9tbbHwRA> [Accessed January 20, 2020].
- Argonne National Laboratory (2017). MG-RAST tutorial: Submitting a dataset <http://youtu.be/A06lBNhnupM> [Accessed January 20, 2020].
- Brown, B.L., Watson, M., Minot, S.S., Rivera, M.C., and Franklin, R.B. (2017). MinION nanopore sequencing of environmental metagenomes: A synthetic approach. *GigaScience* 6, 1-10.
- Chong, J., Liu, P., Zhou, G., and Xia, J. (2020). Using MicrobiomeAnalyst for comprehensive statistical, functional, and meta-analysis of microbiome data. *Nat. Protoc.* 15, 799-821.
- Dhariwal, A., Chong, J., Habib, S., King, I.L., Agellon, L.B., and Xia, J. (2017). MicrobiomeAnalyst: a web-based tool for comprehensive statistical, visual and meta-analysis of microbiome data. *Nucleic Acids Res.* 45, W180-W188.
- Meyer, F., Bagchi, S., Chatterji, S., Gerlach, W., Grama, A., Harrison, T., Paczian, T., Trimble, W.L., and Wilke, A. (2017). MG-RAST version 4: Lessons learned from a decade of low-budget ultra-high-throughput metagenome analysis. *Brief. Bioinformatics* 20, 1151-1159.
- Meyer, F., Paarmann, D., D'Souza, M., Olson, R., Glass, E.M., and Kubal, M. 2008. The metagenomics RAST server: A public resource for the automatic phylogenetic and functional analysis of metagenomes. *BMC Bioinformatics*, 9:386. doi: 10.1186/1471-2105-9-386.
- Mitsunashi, S., Kryukov, K., Nakagawa, S., Takeuchi, J.S., Shiraishi, Y., Asano, K., and Imanishi, T. 2017. A portable system for rapid bacterial composition analysis using a nanopore-based sequencer and laptop computer. *Sci. Rep.*, 7:5657. doi: 10.1038/s41598-017-05772-5.
- Quast, C., Pruesse, E., Yilmaz, P., Gerken, J., Schweer, T., Yarza, P., Peplies, J., and Glöckner, F.O. (2012). The SILVA ribosomal RNA gene database project: Improved data processing and web-based tools. *Nucleic Acids Res.* 41, D590-596.
